# Supplementary material
Source: publisher figshare collection journal article supplement (https://sage.figshare.com/ndownloader/files/20045711)
Supplement: Supplementary file 1 [file 20045711]

## Supplement 1: Survey prior to the introduction of tablets

### 1. How many years of your radiology residency have you completed?

- A. 0–1 years
- B. 1–2 years
- C. 3–4 years
- D. 4–5 years

### 2. Male/Female

### 3. Do you currently use a tablet?

- A. Yes, often
- B. Yes, sometimes
- C. No, never

### 4. If yes, do you use the tablet for clinical purposes or for your education?

- A. Yes, often
- B. Yes, sometimes
- C. No

### 5. What are your main sources of facts/knowledge at present?

- A. Books
- B. e-books
- C. Google
- D. Scientific articles
- E. Specific home pages
- F. Colleagues
- G. Other

### 6. Please specify which books, websites or databases you use:

### 7. How do you prefer to study?

- A. Reading based on cases I have assessed or at random
- B. Reading from the radiology section I am placed on
- C. Reading a book/e-book from cover to cover regardless of which radiology section I am placed on
- D. Other (specify)

### 8. In any given week, how much time do you spend studying radiology during working hours?

- A. 0–1 hour
- B. 1–3 hours
- C. 3–6 hours
- D. 6–10 hours
- E. > 10 hours

### 9. In any given week, how much time do you spend studying radiology outside working hours?

- A. 0–1 hour
- B. 1–3 hours
- C. 3–6 hours
- D. 6–10 hours
- E. > 10 hours

### 10. What learning resources do you presently lack?

- A. Books
- B. e-books
- C. Scientific articles
- D. Anatomy sources
- E. Recordings of local lectures
- F. Self-tests, e.g., RADPrimer
- G. Database of cases (i.e., whole surveys such as Teaching Files)
- H. Other
- I. None

**11. Do you think a tablet could help you in your education? If so, please specify how.**

**12. If not, what would you prefer?**

A. Own computer at the clinic

B. More printed books

C. Other

**13. If so, which tablet do you prefer?**

**14. Do you have any thoughts, comments, tips, etc. regarding the project?**

**15. Which size of tablet would you prefer?**

A. 7.9 inch (iPad Mini)

B. 9.7 inch (iPad)

## Supplement 2: Survey at follow-up after the introduction of tablets

### *Background*

**1. How many years have passed in your radiology residency?**

- A. 0–1 years
- B. 1–2 years
- C. 3–4 years
- D. 4–5 years

**2. Male/Female**

**3. How do you prefer to study?**

- A. Reading based on cases I have assessed or at random
- B. Reading from the radiology section I am placed on
- C. Reading a book/e-book from cover to cover regardless of which radiology section I am placed on
- D. Other (specify)

**4. Did you use a tablet before you were assigned one through this project?**

- A. Yes, often
- B. Yes, sometimes
- C. No, never

**5. If yes, did you use the tablet for clinical purposes or for your education?**

- A. Yes, often
- B. Yes, sometimes
- C. No

**6. What size of iPad do you have?**

- A. Large, iPad Air
- B. Small, iPad Mini

**7. Are you satisfied with that size?**

- A. Yes
- B. No, too big
- C. No, too small

**8. Was there a need for more training/information about how the tablet and the recommended applications work?**

- A. Yes, it was a problem that I didn't get it
- B. Yes, it would have been good, but I've got started well anyway
- C. No

**9. If yes, how would you have liked to get that information?**

**10. Have you had technical problems with your tablet or its use? Please describe if so.**

### *Study time*

**11. In any given week, how much time have you spent on studying radiology during working hours since you got your tablet?**

- A. 0–1 hour
- B. 1–3 hours
- C. 3–6 hours
- D. 6–10 hours
- E. > 10 hours

**12. In any given week, how much time have you spent studying radiology outside working hours since you got your tablet?**

- A. 0–1 hour
- B. 1–3 hours

- C. 3–6 hours
- D. 6–10 hours
- E. > 10 hours

**13. How has the tablet affected how much time you spend studying radiology per week?**

- A. I am studying much more now
- B. I am studying a bit more now
- C. The time remains unchanged
- D. I study less than before
- E. I got a tablet almost as soon as I started my radiology residency, so I have nothing to compare with

**14. How often have you used the tablet in your work/studies? Choose the most suitable option**

- A. 3 days/week or more
- B. 1–2 days/week
- C. 1–3 days/month
- D. Once
- E. Never

*Questions about tablet content*

**15. How often do you use RADPrimer?**

- A. Often, several times per week
- B. Once/several times a month
- C. Used it once
- D. Tried it but don't use it
- E. Have not tried it
- Q. Other: \_\_\_\_\_

**16. What do you think of RADPrimer?** Should we keep it? What is good? What is missing? If you don't use it, why not?

**17. How often do you use STATdx?**

- A. Often, several times per week
- B. Once/several times a month
- C. Used it once
- D. Tried it but don't use it
- E. Have not tried it
- Q. Other: \_\_\_\_\_

**18. What do you think of STATdx?** What is good? Should we keep it? What is missing? If you don't use it, why not?

**19. How often do you use IMAIOS e-Anatomy?**

- A. Often, several times per week
- B. Once/several times a month
- C. Used it once
- D. Tried it but don't use it
- E. Have not tried it
- Q. Other: \_\_\_\_\_

**20. What do you think of IMAIOS e-Anatomy?** What is good? Should we keep it? What is missing? If you don't use it, why not?

**21. Have you used the e-book *Fundamentals Of Diagnostic Radiology*?**

- A. Yes, often or periodically
- B. Sometimes
- C. Have not read it

- D. Did not receive the license code, unable to try  
E. Other: \_\_\_\_\_

**22. What did you think of the e-book *Fundamentals Of Diagnostic Radiology*?**

- A. Good  
B. Poor  
C. Do not know/have not read it

**23. Why do you think so? What was good/bad? Should new residents get it? Do you prefer any other book?**

**24. Suggestions for other e-books that should be on the tablets? Is there any particular topic that you think needs to be covered by an e-book?**

**25. Which of the apps that needed to be pre-paid by you and later reimbursed by the clinic have you downloaded?**

- A. Radiology Assistant  
B. Good Reader  
C. Notability  
D. None

**26. If you have not downloaded any of these apps, why not?**

**27. Select the Apps/Services/e-books that you use and benefit from**

- A. RADPrimer  
B. STATdx  
C. IMAIOS e-Anatomy  
D. GoodReader  
E. Notability  
F. Radiology Assistant  
G. *Fundamentals of Diagnostic Radiology*

*Summary issues*

**28. How did you use the tablet? Several options can be selected**

- A. In daily work, e.g., during an emergency  
B. During course/lectures to read handout/PDF from the lectures  
C. During course/lectures to record  
D. When studying (to record)  
E. Saving and reading articles  
F. Reading e-books  
G. e-Anatomy  
H. As an encyclopedia  
I. STATdx  
J. RADPrimer  
K. Watching videos related to radiology  
L. Listening to lectures or other teaching material  
M. I did not using it at work or for studying  
N. Other:

**29. What application/service/feature has had the GREATEST impact on your radiology training since you got the tablet?**

RADPrimer, STATdx, IMAIOS E-Anatomy, *Fundamentals of Diagnostic Radiology*, Notability, GoodReader, Radiology Assistant

**30. Which of the following resources has had the LEAST impact on your radiology training since you got the tablet?**

RADPrimer, STATdx, IMAIOS E-Anatomy, *Fundamentals of Diagnostic Radiology*, Notability, GoodReader, Radiology Assistant

**31. How do you feel that the quality/effectiveness of your training has been affected by the tablet?**

- A. Much better

- B. A little better
- C. Unchanged
- D. Worse

**32. To what extent has the tablet facilitated access to educational materials?**

- A. High degree
- B. Low degree
- C. Not at all

**33. How has the experience of studying radiology changed since you got the tablet?**

- A. It is more fun/better now
- B. It remains unchanged
- C. It is worse now

**34. How do you mainly search for knowledge currently?** Several options can be selected

- A. Printed books
- B. e-books
- C. Specific home page
- D. Google
- E. Ask colleagues
- F. Scientific articles
- G. Lectures/videos, e.g., YouTube
- H. STATdx
- I. RADPrimer
- J. Other

**35. Please name some of your sources of knowledge**

**36. What do you lack at present in terms of learning resources?**

- A. Books
- B. e-books
- C. Scientific articles
- D. Anatomy sources
- E. Recordings of internal lectures
- F. Self-tests, e.g., RADPrimer
- G. Database of cases (i.e. whole surveys such as Teaching Files)
- H. Nothing
- I. Other \_\_\_\_ (in...) \_\_\_\_

**37. Comments, requests, suggestions** Do you have any thoughts or suggestions about the survey, the project, or anything else? Are you missing any specific app?

**38. Would you recommend the tablet with the current content to a colleague/new physician?**

- A. Yes
- B. No
- C. I do not know

**39. When did you receive your tablet?** (*only asked in the last evaluation*)

- A. Spring 2015
- B. Fall 2015
- C. Spring 2016
